# Supplementary material for: High performance lithium–sulfur batteries with a permselective sulfonated acetylene black modified separator
Source: Royal Society of Chemistry journal article supplement (doi:10.1039/c6ta02680j), 2016-01-01
Supplement: c6ta02680j1.pdf [file c6ta02680j1.pdf]

## Supporting Information

### **High Performance Lithium-Sulfur Batteries with a Permselective Sulfonated Acetylene Black Modified Separator**

Fanglei Zeng,<sup>a</sup> Zhaoqing Jin,<sup>b</sup> Keguo Yuan,<sup>b</sup> Shuai Liu,<sup>b,c</sup> Xing Cheng,<sup>b,c</sup> Anbang Wang,<sup>\*b</sup> Weikun Wang<sup>\*b</sup> and Yu-sheng Yang<sup>b</sup>

<sup>a</sup> School of Materials Science & Engineering, Beijing Institute of Technology, Beijing 100081, China

<sup>b</sup> Military Power Sources Research and Development Center, Research Institute of Chemical Defense, Beijing 100191, China

\*E-mail: wab\_wang2000@126.com; wangweikun2002@126.com.

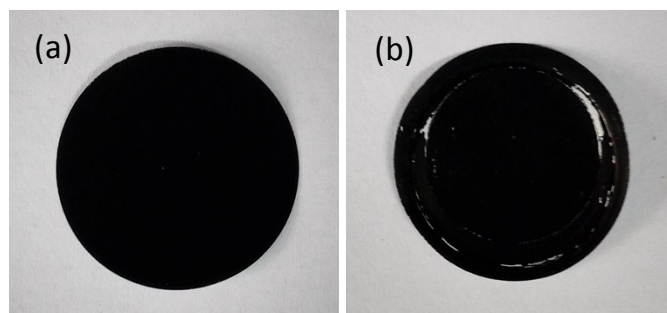

**Figures S1** The AB-SO<sub>3</sub><sup>-</sup> coated separator (a) before and (b) after cycling.

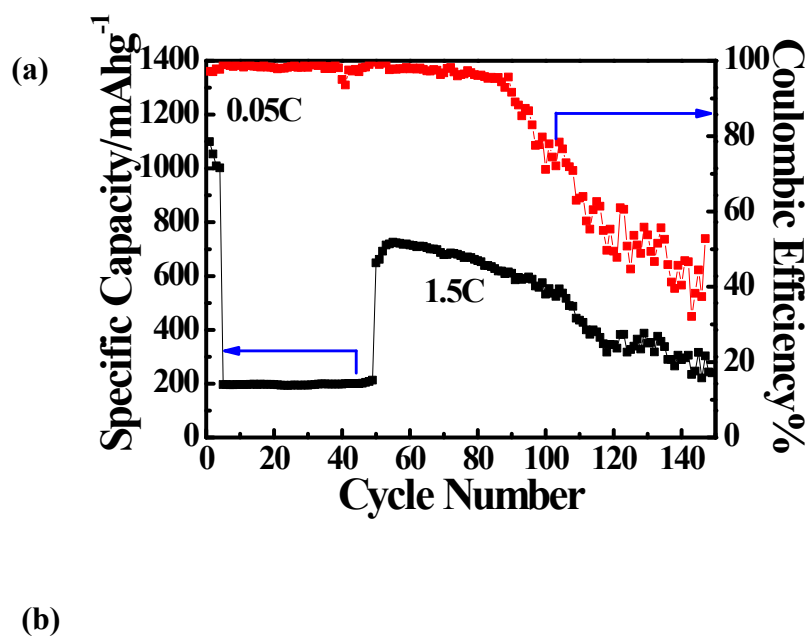

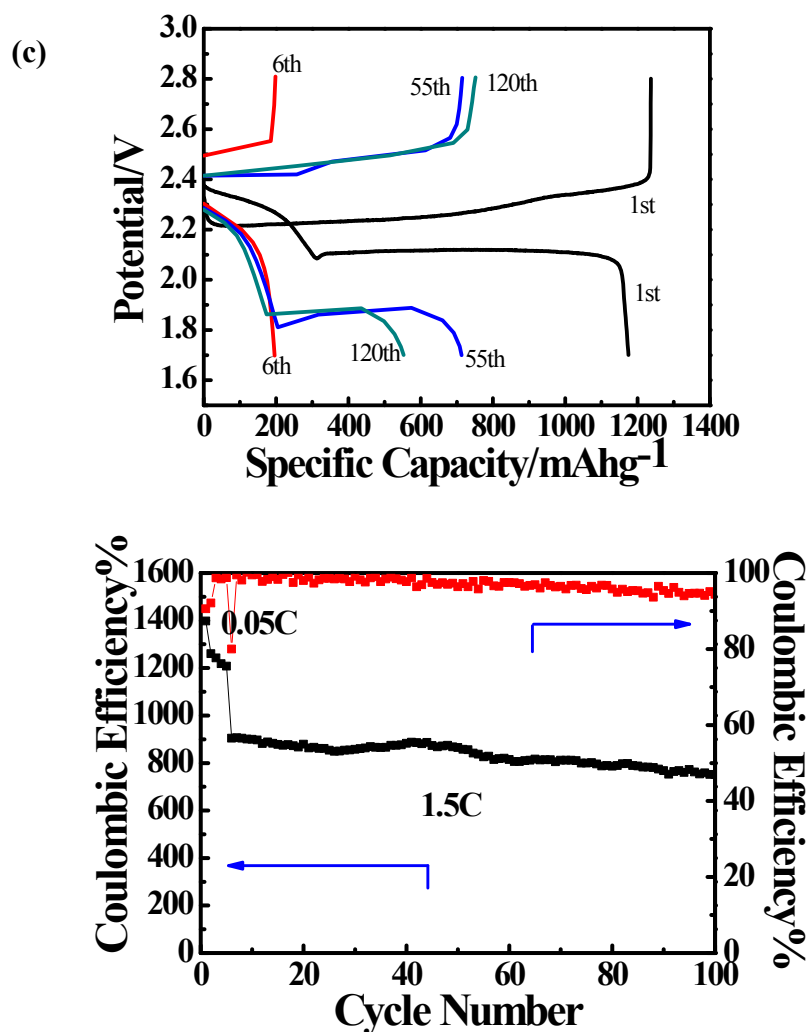

**Figure S2** (a) Cycle performances and Coulombic efficiency of Li-S cell using the pristine Celgard separator at 1.5 C. (b) Charge-discharge curves of Li-S cell using the pristine Celgard separator at 1.5 C. (c) Cycle performances and Coulombic efficiency of Li-S cell using AB-SO<sub>3</sub><sup>-</sup> modified separator at 1.5 C.

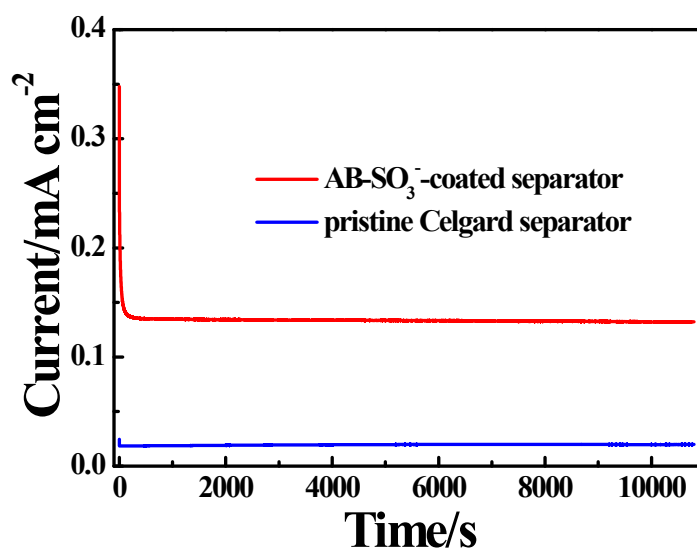

**Figure S3** The potentiostatic polarization curves of Li-S cell with Pristine Celgard separator and AB-SO<sub>3</sub><sup>-</sup> modified separator.
